# Supplementary material for: Are Healthcare Workers Infected with SARS-CoV-2 at Home or at Work? A Comparative Prevalence Study
Source: MDPI journal article supplement (doi:10.3390/ijerph191912951), 2022-10-10
Supplement: s1 [file s1]

**Table S1:** Relative Rate Ratios for Hadassah Workers by Neighbourhoods of residence.

| Neighbourhood                                    | Adult Population | Positive Adult | Hadassah Workers | Hadassah Positive Cases | RR (CI)          | Subgroup        |
|--------------------------------------------------|------------------|----------------|------------------|-------------------------|------------------|-----------------|
| <b>Neighbourhoods with More than 200 workers</b> |                  |                |                  |                         |                  |                 |
| H01                                              | 16561            | 477            | 397              | 24                      | 2.1 (1.4 - 3.1)  | Jewish          |
| H02                                              | 31976            | 915            | 371              | 22                      | 2.1 (1.4 - 3.1)  | Jewish          |
| H03                                              | 23824            | 630            | 237              | 4                       | 0.7 (0.3 - 1.7)  | Jewish          |
| H04                                              | 10350            | 171            | 217              | 14                      | 4.0 (2.4 - 6.7)  | Jewish          |
| <b>Neighbourhoods with 100-200 workers</b>       |                  |                |                  |                         |                  |                 |
| H05                                              | 14313            | 196            | 198              | 4                       | 1.6 (0.7 - 4.1)  | Jewish          |
| H06                                              | 16615            | 421            | 191              | 14                      | 3 (1.8 - 4.9)    | Jewish          |
| H07                                              | 29076            | 1196           | 153              | 20                      | 3.2 (2.2 - 4.8)  | Arab            |
| H08                                              | 11053            | 390            | 136              | 11                      | 2.4 (1.4 - 4.1)  | Jewish          |
| H09                                              | 3482             | 69             | 135              | 13                      | 5 (2.9 - 8.7)    | Jewish          |
| H10                                              | 9747             | 421            | 111              | 15                      | 3.2 (2.0 - 5.1)  | Arab            |
| H11                                              | 15542            | 669            | 109              | 17                      | 3.7 (2.4 - 5.7)  | Arab            |
| H12                                              | 7589             | 112            | 106              | 6                       | 4.1 (1.9 - 8.8)  | Jewish          |
| H13                                              | 8302             | 121            | 102              | 4                       | 3.0 (1.2 - 7.5)  | Jewish          |
| H14                                              | 30664            | 2077           | 102              | 4                       | 0.6 (0.3 - 1.6)  | Orthodox Jewish |
| <b>Neighbourhoods with 50-100 workers</b>        |                  |                |                  |                         |                  |                 |
| H15                                              | 3327             | 77             | 96               | 1                       | 0.7 (0.1 - 3.3)  | Jewish          |
| H16*                                             | 45               | 0              | 93               | 6                       | 6.3 (0.4 - 10.9) | Jewish          |
| H17                                              | 12106            | 207            | 90               | 4                       | 2.9 (1.2 - 7.2)  | Jewish          |
| H18                                              | 13687            | 554            | 90               | 9                       | 2.6 (1.4 - 4.7)  | Arab            |
| H19                                              | 24053            | 874            | 73               | 13                      | 5.0 (3.1 - 8.2)  | Arab            |
| H20                                              | 1623             | 16             | 70               | 4                       | 6.3 (2.3 - 17.0) | Jewish          |
| H21                                              | 20076            | 969            | 64               | 9                       | 3.0 (1.7 - 5.5)  | Arab            |
| H22                                              | 5311             | 96             | 64               | 3                       | 3 (1.1 - 8.4)    | Jewish          |
| H23                                              | 2917             | 32             | 64               | 0                       | 0.7 (0.1 - 11.0) | Jewish          |
| H24                                              | 6605             | 104            | 64               | 4                       | 4.4 (1.8 - 10.0) | Jewish          |
| H25                                              | 8834             | 141            | 63               | 2                       | 2.5 (0.7 - 8.3)  | Jewish          |
| H26                                              | 5960             | 216            | 61               | 2                       | 1.1 (0.3 - 3.8)  | Jewish          |
| H27                                              | 14751            | 419            | 60               | 6                       | 3.8 (1.8 - 7.8)  | Arab            |
| H28                                              | 11130            | 569            | 58               | 13                      | 4.5 (2.8 - 7.2)  | Arab            |
| H29                                              | 3404             | 72             | 56               | 2                       | 2.1 (0.6 - 7.1)  | Jewish          |
| H30                                              | 14866            | 1064           | 54               | 6                       | 1.7 (0.8 - 3.4)  | Orthodox Jewish |
| H31                                              | 4885             | 149            | 53               | 1                       | 0.9 (0.2 - 4.4)  | Jewish          |
| <b>Neighbourhoods with less than 50 workers</b>  |                  |                |                  |                         |                  |                 |
| H32                                              | 7005             | 146            | 49               | 2                       | 2.4 (0.7 - 8.1)  | Jewish          |
| H33                                              | 12336            | 364            | 47               | 6                       | 4.6 (2.2 - 9.5)  | Arab            |
| H34                                              | 9797             | 388            | 46               | 7                       | 4.1 (2.1 - 7.8)  | Arab            |
| H35                                              | 1757             | 52             | 43               | 0                       | 0.4 (0.1 - 6.1)  | Jewish          |
| H36                                              | 3673             | 127            | 41               | 4                       | 3.1 (1.3 - 7.6)  | Jewish          |
| H37                                              | 992              | 10             | 41               | 3                       | 8 (2.5 - 25.0)   | Jewish          |
| H38                                              | 2680             | 35             | 37               | 1                       | 3.0 (0.6 - 14.0) | Jewish          |

|     |       |      |    |   |                    |                 |
|-----|-------|------|----|---|--------------------|-----------------|
| H39 | 12139 | 510  | 35 | 5 | 3.7 (1.7 - 7.9)    | Arab            |
| H40 | 12797 | 759  | 33 | 3 | 1.8 (0.6 - 4.7)    | Orthodox Jewish |
| H41 | 7476  | 307  | 32 | 5 | 4.1 (1.9 - 8.8)    | Arab            |
| H42 | 1234  | 33   | 32 | 0 | 0.6 (0.1 - 9.0)    | Jewish          |
| H43 | 7259  | 146  | 30 | 3 | 5.7 (2.1 - 15.0)   | Jewish          |
| H44 | 12084 | 774  | 27 | 1 | 0.8 (0.2 - 4.0)    | Orthodox Jewish |
| H45 | 2717  | 38   | 26 | 2 | 6.7 (2 - 22.0)     | Jewish          |
| H46 | 7750  | 564  | 22 | 3 | 2.1 (0.8 - 5.6)    | Orthodox Jewish |
| H47 | 18721 | 737  | 20 | 4 | 5.6 (2.5 - 12.0)   | Arab            |
| H48 | 1663  | 10   | 20 | 0 | 3.9 (0.2 - 63.0)   | Jewish          |
| H49 | 1739  | 52   | 18 | 1 | 2.7 (0.6 - 12.0)   | Jewish          |
| H50 | 1856  | 48   | 17 | 0 | 1.1 (0.1 - 17.0)   | Jewish          |
| H51 | 4778  | 187  | 16 | 2 | 3.9 (1.2 - 12.0)   | Arab            |
| H52 | 9855  | 822  | 14 | 0 | 0.4 (0.1 - 6.3)    | Orthodox Jewish |
| H53 | 19224 | 1512 | 13 | 1 | 1.4 (0.3 - 6.3)    | Orthodox Jewish |
| H54 | 3011  | 54   | 13 | 1 | 6.1 (1.3 - 28.0)   | Jewish          |
| H55 | 8144  | 647  | 12 | 2 | 2.5 (0.8 - 7.6)    | Orthodox Jewish |
| H56 | 2618  | 168  | 7  | 0 | 1.0 (0.1 - 15.0)   | Orthodox Jewish |
| H57 | 488   | 4    | 7  | 0 | 7.2 (0.4 - 122)    | Jewish          |
| H58 | 9199  | 518  | 5  | 0 | 1.6 (0.1 - 22.0)   | Orthodox Jewish |
| H59 | 2309  | 119  | 5  | 0 | 1.8 (0.1 - 24.0)   | Jewish          |
| H60 | 4898  | 235  | 4  | 0 | 2.3 (0.2 - 31.0)   | Orthodox Jewish |
| H61 | 2810  | 171  | 4  | 0 | 1.8 (0.1 - 24.0)   | Jewish          |
| H62 | 3073  | 88   | 4  | 1 | 11.6 (3.8 - 43.0)  | Jewish          |
| H63 | 1802  | 113  | 3  | 1 | 6.8 (2.0 - 23.0)   | Orthodox Jewish |
| H64 | 2413  | 39   | 2  | 0 | 12.2 (1.0 - 148)   | Jewish          |
| H65 | 729   | 17   | 2  | 1 | 25.0 (8.2 - 76.0)  | Jewish          |
| H66 | 6863  | 502  | 1  | 0 | 4.5 (0.5 - 43.0)   | Orthodox Jewish |
| H67 | 5195  | 362  | 1  | 0 | 4.8 (0.5 - 46.0)   | Orthodox Jewish |
| H68 | 3524  | 227  | 1  | 1 | 15.5 (13.6 - 17.0) | Orthodox Jewish |
| H69 | 5422  | 192  | 1  | 0 | 9.4 (1 - 90.0)     | Orthodox Jewish |
| H70 | 722   | 28   | 1  | 0 | 8.4 (0.8 - 83.0)   | Jewish          |

\*H16 – The Hadassah medical center workers dormitory with no corresponding general population.
